# Supplementary material
Source: PubMed Central journal article supplement (PMC8739815)
Supplement: jamaoncol-e216439-s001.pdf [file jamaoncol-e216439-s001.pdf]

## Supplemental Online Content

Anscher MS, Arora S, Weinstock C, et al. Association of radiation therapy with risk of adverse events in patients receiving immunotherapy: a pooled analysis of trials in the US Food and Drug Administration database. *JAMA Oncol*. Published online January 6, 2022.  
doi:10.1001/jamaoncol.2021.6439

**eMethods.** Statistical Analysis Details

**eTable 1.** List of Trials Included in Analysis

**eTable 2.** Grouping of Adverse Event Terms

**eTable 3.** Analysis of AE Rates for the Matched Patients Who Received RT Within 90 Days Before Initiating an ICI vs the Corresponding Matched Patients Who Did Not Receive RT Adjusted for the Length of Time Each Patient Was on Study

This supplemental material has been provided by the authors to give readers additional information about their work.

## **eMethods. Statistical Analysis Details**

Patients with missing performance status and prior lines of therapy data were assigned an “unknown” category to enable matching. For the propensity score analysis, performance status assigned score was grouped as 0-1, 2+, or unknown; prior lines of therapy were grouped as 0-1 vs 2+ or unknown, tumor type was considered as melanoma, renal, lung, bladder, head and neck, or other and type of ICI-based therapy was categorized as anti-CTLA-4, anti-PD-1, anti-PD-L1, anti-PD-1 plus anti-CTLA-4, anti-PD-1 plus tyrosine kinase inhibitor and anti-PD-1 plus chemotherapy.

To maintain a conservative approach, differences between groups of  $\geq 1\%$  for higher incidence groups or ratios of AE occurrence of  $\geq 2$  for lower incidence groups were considered potentially clinically meaningful. Higher incidence groups and lower incidence groups were identified based on observing  $\geq 1\%$  and  $< 1\%$  incidence of an AE prior to matching, respectively.

| <b>eTable 1. List of Trials Included in Analysis</b> |             |
|------------------------------------------------------|-------------|
| <b>ClinicalTrials.gov NCT Identification number</b>  |             |
| 1.                                                   | NCT01772004 |
| 2.                                                   | NCT01943461 |
| 3.                                                   | NCT02155647 |
| 4.                                                   | NCT01295827 |
| 5.                                                   | NCT01704287 |
| 6.                                                   | NCT01866319 |
| 7.                                                   | NCT01905657 |
| 8.                                                   | NCT01848834 |
| 9.                                                   | NCT01953692 |
| 10.                                                  | NCT01876511 |
| 11.                                                  | NCT02039674 |
| 12.                                                  | NCT02142738 |
| 13.                                                  | NCT02054806 |
| 14.                                                  | NCT02220894 |
| 15.                                                  | NCT02256436 |
| 16.                                                  | NCT02335424 |
| 17.                                                  | NCT02362594 |
| 18.                                                  | NCT02255097 |
| 19.                                                  | NCT02335411 |
| 20.                                                  | NCT02453594 |
| 21.                                                  | NCT02628067 |
| 22.                                                  | NCT02460198 |
| 23.                                                  | NCT02576990 |
| 24.                                                  | NCT02564263 |
| 25.                                                  | NCT02578680 |
| 26.                                                  | NCT02702414 |
| 27.                                                  | NCT02775435 |
| 28.                                                  | NCT02195479 |
| 29.                                                  | NCT02684006 |
| 30.                                                  | NCT00730639 |
| 31.                                                  | NCT01024231 |
| 32.                                                  | NCT01358721 |
| 33.                                                  | NCT01472081 |
| 34.                                                  | NCT01642004 |
| 35.                                                  | NCT01668784 |
| 36.                                                  | NCT01928394 |
| 37.                                                  | NCT01721746 |
| 38.                                                  | NCT01592370 |
| 39.                                                  | NCT01658878 |

|                 |
|-----------------|
| 40. NCT01673867 |
| 41. NCT01721772 |
| 42. NCT01844505 |
| 43. NCT01927419 |
| 44. NCT02105636 |
| 45. NCT02060188 |
| 46. NCT02066636 |
| 47. NCT02181738 |
| 48. NCT02231749 |
| 49. NCT02388906 |
| 50. NCT02387996 |
| 51. NCT02713867 |
| 52. NCT02714218 |
| 53. NCT01693562 |
| 54. NCT02453282 |
| 55. NCT02125461 |
| 56. NCT02087423 |
| 57. NCT02207530 |
| 58. NCT01846416 |
| 59. NCT01903993 |
| 60. NCT02031458 |
| 61. NCT02366143 |
| 62. NCT02763579 |
| 63. NCT00057889 |
| 64. NCT02267343 |
| 65. NCT01375842 |
| 66. NCT02425891 |
| 67. NCT02853331 |
| 68. NCT02501096 |

| <b>eTable 2. Grouping of Adverse Event Terms</b>      |                                                                                                                                                                                                                                          |
|-------------------------------------------------------|------------------------------------------------------------------------------------------------------------------------------------------------------------------------------------------------------------------------------------------|
| Neurologic AEs of interest                            | Meningitis, encephalitis, myelitis, demyelination, myasthenic syndrome, myasthenia gravis, Guillain-Barré syndrome, nerve palsy, autoimmune neuropathy                                                                                   |
| Skin (Stevens-Johnson; Toxic Epidermal Necrolysis)    | Erythema multiforme, Stevens-Johnson syndrome; Toxic epidermal necrolysis                                                                                                                                                                |
| Renal AEs of interest                                 | Autoimmune nephritis, Glomerulonephritis, Glomerulonephritis acute, Nephritic syndrome, Nephrotic syndrome, Tubulointerstitial nephritis, Renal tubular necrosis, Immune-mediated nephritis, Nephritis radiation, Nephritis haemorrhagic |
| Endocrine AEs of interest                             | new onset diabetes mellitus, hyperglycemia, Adrenal insufficiency, diabetes, hyperthyroidism, hypothyroidism, Diabetic Ketoacidosis, type 1 diabetes mellitus                                                                            |
| Fatigue                                               | Asthenia, Fatigue, Malaise, Lethargy, decreased activity                                                                                                                                                                                 |
| Neutropenia                                           | Autoimmune neutropenia, Febrile neutropenia, neutropenia, Chemotherapy induced neutropenia                                                                                                                                               |
| Thrombocytopenia                                      | Thrombocytopenia                                                                                                                                                                                                                         |
| Pneumonitis                                           | Pneumonitis, Interstitial Lung Disease, Pulmonary Fibrosis, Acute Interstitial Pneumonitis, Alveolitis Necrotising, Alveolitis, Hypersensitivity Pneumonitis, Organizing Pneumonia                                                       |
| Diarrhoea and related AEs of interest                 | autoimmune colitis, colitis, colitis microspscopic, enterocolitis, frequent bowel movements, diarrhea, diarrhea hemorrhagic, enteritis, gastroenteritis, Diarrhoea, Diarrhoea haemorrhagic                                               |
| Hepatitis                                             | Autoimmune hepatitis, hepatitis, hepatitis acute                                                                                                                                                                                         |
| Myocarditis                                           | Autoimmune myocarditis, eosinophilic myocarditis, myocarditis                                                                                                                                                                            |
| Musculoskeletal and Connective Tissue AEs of interest | Myositis, polymyositis, rhabdomyolysis, arthritis, polymyalgia rheumatica                                                                                                                                                                |

**eTable 3. Analysis of AE Rates for the Matched Patients Who Received RT Within 90 Days Before Initiating an ICI vs the Corresponding Matched Patients Who Did Not Receive RT Adjusted for the Length of Time Each Patient Was on Study**

|                  | <b>Rates per 100 person-years<br/>(1:1 Propensity Score Matched set)</b> |                    |
|------------------|--------------------------------------------------------------------------|--------------------|
| <b>AE</b>        | <b>No RT (n=1662)</b>                                                    | <b>RT (n=1662)</b> |
| neutropenia      | 4.05                                                                     | 4.02               |
| thrombocytopenia | 4.45                                                                     | 5.46               |
| pneumonitis      | 6.59                                                                     | 11.31              |
| colitis          | 5.78                                                                     | 4.69               |
| hepatitis        | 1.79                                                                     | 1.63               |
| myocarditis      | 0.14                                                                     | 0.10               |
| neurologic       | 0.39                                                                     | 0.38               |
| skin             | 0.35                                                                     | 0.19               |
| renal            | 0.47                                                                     | 0.67               |
| endocrine        | 23.08                                                                    | 24.53              |
| fatigue          | 78.27                                                                    | 88.24              |
| diarrhea         | 46.53                                                                    | 45.03              |
| muscular         | 2.49                                                                     | 2.40               |
